# Supplementary material
Source: MDPI journal article supplement (https://www.mdpi.com/2413-4155/3/2/26)
Supplement: s1 [file s1]

**Supplementary Table S1. List of primers used in these experiments.**

|          |                                 |
|----------|---------------------------------|
| ATF4-F   | 5'- GTTCTCCAGCGACAAGGCTA-3'     |
| ATF4-R   | 5'- ATCCTGCTTGCTGTTGTTGG-3'     |
| BiP-F    | 5'- TGTTCACCAATTATCAGCAAACTC-3' |
| BiP-R    | 5'- TTCTGCTGTATCCTCTTCACCAGT-3' |
| CHOP-F   | 5'- AGAACCAGGAAACGGAAACAGA-3'   |
| CHOP-R   | 5'- TCTCCTTCATGCGCTGCTTT-3'     |
| SOX2OT-F | 5'- GCTCGTGGCTTAGGAGATTG -3'    |
| SOX2OT-R | 5'- CTGGCAAAGCATGAGGAAC -3'     |
| SOX2-F   | 5'-AACCCCAGATGCACAA CTC-3'      |
| SOX2-R   | 5'-GCTTAGCCTCGTCGATGAAC-3'      |
| XBP1s-F  | 5'- CCTGTTGCTGAAGAGGAGG-3'      |
| XBP1s-R  | 5'- CCATGGGGAGATGTTCTGGAG -3'   |
| HPRT-F   | 5'-TGAGGATTTGGAAAGGGTGT-3'      |
| HPRT-R   | 5'-GCACACAGAGGGCTACAATG-3'      |
| GAPDH-F  | 5'-ACGGG AAGCTTGTCATCAAT-3'     |
| GAPDH-R  | 5'-TGGACTCCACGACGTACTCA-3'      |
| HPRT-F   | 5'-TGAGGATTTGGAAAGGGTGT-3'      |
| HPRT-R   | 5'-GCACACAGAGGGCTACAATG-3'      |

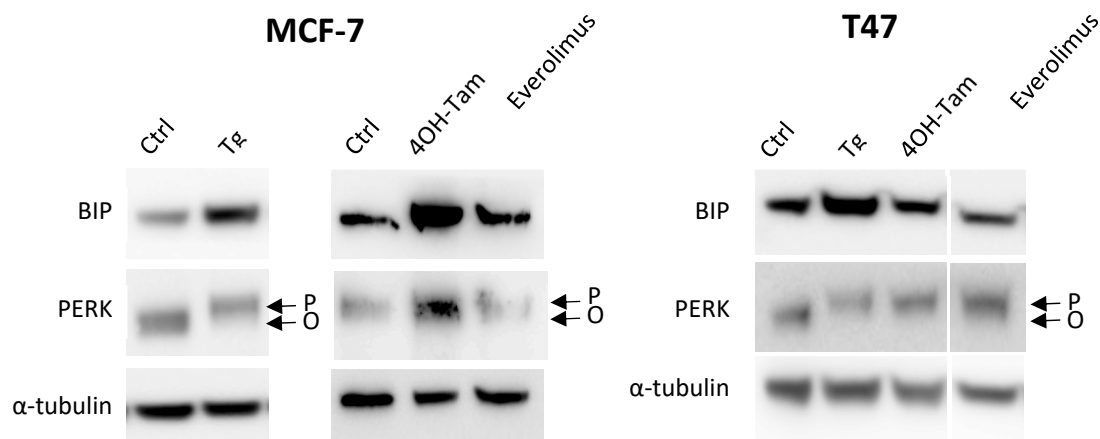

**Supplemental Figure S1: Expression of *SOX2OT* lncRNA and *SOX2* following UPR induction in ER+ breast cancer cell lines.** MCF-7 (A) and T47D (B) cells were incubated in control medium (Ctrl) or in medium containing the ER stress-inducing agents thapsigargin (Tg, 300 nM), 4OH-Tam (0.1uM) or everolimus (10nM) for 16h. Protein expression levels of PERK and BIP protein expression were examined using Western Blot analysis. O and P indicate mobility changes for PERK proteins nonactivated or activated by phosphorylation, respectively.  $\alpha$ -tubulin was used as internal control. Blots of Bip, PERK, and  $\alpha$ -tubulin have been performed on the same electrophoresis gel, but cut and reconstituted.

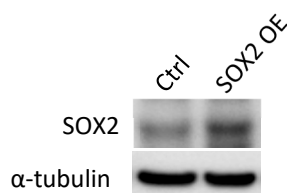

**Supplemental Figure S2: Comparison of *SOX2* expression in control and *SOX2* overexpressing MDA-MB-231.** *SOX2* protein expression was examined using Western Blot analysis.  $\alpha$ -tubulin was used as internal control. Ctrl, control; *SOX2* OE, *SOX2* overexpression.

**Supplementary Table S2.** Spearman correlation coefficients of relative gene expression for *SOX2OT* compared to the expression of genes of the UPR pathways in TCGA Her2 neg/pos or Hormone neg/pos samples (n = 478)

| <i>Her2neg/HRpos#</i><br><i>n=279</i> | <i>ATF4</i> | <i>CHOP</i>     | <i>GADD</i>    | <i>PDIA4</i>    | <i>XBP1</i>    | <i>BiP</i>    |
|---------------------------------------|-------------|-----------------|----------------|-----------------|----------------|---------------|
| <i>SOX2OT</i>                         | -0.0252     | <b>-0.159**</b> | <b>-0.132*</b> | -0.0655         | <b>0.296**</b> | <b>0.119*</b> |
| <i>p</i> value                        | 0.676       | <b>0.00768</b>  | <b>0.0280</b>  | 0.275           | <b>5.61E-7</b> | <b>0.0471</b> |
| <i>Her2neg/HRneg##</i><br><i>n=84</i> |             |                 |                |                 |                |               |
| <i>SOX2OT</i>                         | -0.145      | -0.181          | <b>-0.227*</b> | <b>-0.364**</b> | <b>0.474**</b> | -0.209        |
| <i>p</i> value                        | 0.187       | 0.0999          | <b>0.0381</b>  | <b>7.10E-4</b>  | <b>6.43E-6</b> | 0.0563        |
| <i>Her2Pos/HRpos#</i><br><i>n=37</i>  |             |                 |                |                 |                |               |
| <i>SOX2OT</i>                         | -0.321      | <b>-0.385*</b>  | -0.0749        | 0.0894          | 0.211          | 0.0756        |
| <i>p</i> value                        | 0.0530      | <b>0.0190</b>   | 0.657          | 0.597           | 0.209          | 0.654         |
| <i>Her2Pos/HRneg##</i><br><i>n=18</i> |             |                 |                |                 |                |               |
| <i>SOX2OT</i>                         | 0.262       | 0.0975          | -0.0332        | -0.204          | 0.435          | -0.362        |
| <i>p</i> value                        | 0.285       | 0.692           | 0.889          | 0.407           | 0.0699         | 0.136         |

#HRpos: hormone positive, ER or PR positive samples ##HRneg : hormone negative, ER or PR negative samples

\*p<0.05; \*\*p<0.01
